1 **Construction of simplified microbial consortia to degrade recalcitrant materials based on**  
2 **enrichment and dilution-to-extinction cultures**

3

4 Dingrong Kang<sup>1</sup>, Samuel Jacquioid<sup>1,2</sup>, Jakob Herschend<sup>1</sup>, Shaodong Wei<sup>1</sup>, Joseph Nesme<sup>1</sup>, Søren  
5 J. Sørensen<sup>1\*</sup>

6

7 <sup>1</sup>Section of Microbiology, Department of Biology, University of Copenhagen, Copenhagen,  
8 Denmark

9 <sup>2</sup>Agroécologie, AgroSup Dijon, INRA, Univ. Bourgogne Franche-Comté, France

10

11 \*Corresponding author

12

13 Running title: Simplifying microbial consortia for biodegradation

14

15

16 **Keywords:** simplified microbial consortia, biodegradation, enrichment cultivation, dilution-to-  
17 extinction, recalcitrant materials

18

19

20

21

22

23

24 **Abstract**

25

26 The capacity of microbes degrading recalcitrant materials has been extensively explored from  
27 environmental remediation to industrial applications. Although significant achievements were  
28 obtained with single strains, focus is now going toward the use of microbial consortia because of  
29 advantages in terms of functional stability and efficiency. While consortia assembly attempts  
30 were made from several known single strains, another approach consists in obtaining consortia  
31 from complex environmental microbial communities in search for novel microbial species,  
32 genes and functions. However, assembling efficient microbial consortia from complex  
33 environmental communities is far from trivial due to large diversity and biotic interactions at  
34 play. Here we propose a strategy containing enrichment and dilution-to-extinction cultures to  
35 construct simplified microbial consortia (SMC) for keratinous waste management, from  
36 complex environmental communities. Gradual dilutions were performed from a keratinolytic  
37 microbial consortium, and dilution  $10^{-9}$  was selected to construct a SMC library. Further  
38 compositional analysis and keratinolytic activity assays demonstrated that microbial consortia  
39 were successfully simplified, without impacting their biodegradation capabilities. These SMC  
40 possess promising potential for efficient keratinous valorization. More importantly, this  
41 reasoning and methodology could be transferred to other topics involving screening for  
42 simplified communities for biodegradation, thus considerably broadening its application scope.

43

44

45

46

## 47 **Importance**

48

49 Microbial consortia have got more and more attention and extensive applications due to their  
50 potential advantages. However, a high diversity of microbes is likely to hide uncontrollable risks  
51 in practice specific to novel strains and complicated interaction networks. Exploring a  
52 convenient and efficient way to construct simplified microbial consortia is able to broaden the  
53 applied scope of microbes. This study presents the approach based on enrichment and dilution-  
54 to-extinction cultures, which gain abundance microbial consortia including some without losing  
55 efficiency from the enriched functional microbial community. The microbial interactions at the  
56 strain level were evaluated by using compositional identification and correlation analysis, which  
57 contribute to revealing the roles of microbes in the degradation process of recalcitrant materials.  
58 Our findings provide a systematic scheme to achieve optimizing microbial consortia for  
59 biodegradation from an environmental sample, could be readily applied to a range of recalcitrant  
60 materials management from environmental remediation to industrial applications.

61

62

## 63 **Introduction**

64

65 Microbial degradation aims to harness the potential of enzymatic processes of naturally  
66 occurring microorganisms to break down complex, and usually environmentally recalcitrant  
67 materials (1). Biodegradation is widely used in agricultural and industrial fields, especially when  
68 dealing with substances, which are difficult to dissolve and/or resistant to decomposition under  
69 mild conditions (2, 3). Large number of microorganisms have been isolated and characterized

70 for their efficient capacity to degrade recalcitrant molecules such as organophosphorus  
71 compounds, being the most commercially favored group of pesticides, also posing a risk to  
72 human health (4, 5). Another example is the utilization of microbes to metabolize lignocellulose  
73 materials which represent a renewable carbon source with potential application as biofuel (6).  
74 To that end, microbial consortia gained from complex environmental communities harboring  
75 unknown genes, metabolic activities and species, hold a colossal application potential for  
76 enhancing the efficiency of bioprocesses, particularly when dealing with substances that are  
77 resistant to decomposition (7, 8). They have received increasing attention due to their promising  
78 advantages on handling environmental problems (9).

79  
80 Microbial consortia consist of several species working together, providing both robustness and  
81 broad metabolic capacities (9). They may be assembled synthetically from scratch by combining  
82 several isolated strains (10), or conversely yielded from complex environmental microbial  
83 communities, like soil (11). Mixed populations are not only able to perform some difficult tasks  
84 that would not even be possible for individual strains, but offer more stability and resilience  
85 against environmental fluctuations (12). They are superior compared to single strains with  
86 respect to degradative efficiency in many cases (13). Unlike single strains isolation, enrichment  
87 process involving directed artificial selection is often used to obtain desired microbial consortia  
88 from the environment (14, 15). In general, composition of consortia gradually changes over time,  
89 including a richness reduction along with emergence of dominant microbes due to competitive  
90 exclusion (16). Nevertheless, many species are likely to benefit from the enrichment due to  
91 complex microbial interactions conferring functional stability and redundancy (17, 18). For  
92 instance, a total of 17 bacterial strains and 13 methanogens were identified from established

93 microbial consortia depolymerizing lignin (19). Therefore, this intrinsic high diversity level of  
94 enriched microbial consortia represents a bottleneck in our attempts to move forward with  
95 potential industrial applications due to several aspects, like i) potential negative correlation with  
96 efficiency (20), ii) species with undesired function, iii) security threat posed by pathogens  
97 presence, and iv) risks of losing the properties of interest if hold by keystone species. Utilization  
98 of microbial consortia with less complexity, but equal efficiency, lead to more controlled and  
99 optimized industrial processes (10). Hence, it is crucial to find reliable strategies to narrow  
100 down the diversity towards optimum simplified microbial consortia. A reductive-screening  
101 approach was applied to construct effective minimal microbial consortia for lignocellulose  
102 degradation based on different metabolic functional groups (10). Additionally, artificial  
103 selection approaches (dilution, toxicity, and heat) have been employed to obtain desired  
104 bacterial consortia (21). A minimal effective hydrogen-producing microbial consortium was  
105 constructed *via* dilution-to-extinction culture from cow rumen communities (22). Dilution-to-  
106 extinction culture is expected to provide more advantages compared to conventional isolation  
107 and assembly as it i) generates many microbial combinations ready to be screened, ii) includes  
108 all strains from the initial microbial pool that might be lost due to cultivation/isolation biases  
109 and iii) ensure that all microbes are physically present and interacting spontaneously (23).

110  
111 Keratins are insoluble fibrous proteins with cross-linked components, representing the most  
112 abundant proteins in epithelial cells (24). Keratinous materials are classified as one of the waste  
113 materials categories according to European parliament regulations (25). They could cause an  
114 environmental imbalance and potential pollution to soil or water because of their recalcitrant  
115 form in municipal waste (26). Hence, seeking the effective approach to keratinous waste

116 management will contribute to eliminate their environmental risks. In fact, keratinous materials  
117 are estimated to have considerable economic value after biodegradation (27). A microbial  
118 consortium (KMCG6) was enriched from an environmental sample culturing in  $\alpha$ -keratin based  
119 medium, which possesses an efficient keratinolytic activity (11). Despite successful diversity  
120 reduction during enrichment, it still includes plenty of microbes affiliating to distinct genera  
121 (11). In this work, we applied the concept of dilution-to-extinction culture to KMCG6 as a case  
122 study (Fig. 1), resulting in efficient simplified microbial consortia (SMC).

123

## 124 **Results and Discussion**

125

126 **Phylogenetic analysis of microbial consortium KMCG6.** Microbial consortia have shown  
127 numerous advantages for the processing of recalcitrant molecules and materials which are hard  
128 to degrade or convert (9), and may even represent environmental and threats (26).  
129 Microorganisms represent a colossal, yet still a poorly tapped resource for applied microbiology  
130 and biotechnology. Many efforts attempting to learn from nature have used microbial consortia  
131 for bioconversion. Microbial consortium KMCG6, displaying efficient keratinolytic activity,  
132 was enriched from a soil sample as previously described (11). Taxonomic composition analysis  
133 at phylogenetic levels (class, genus, and OTU) along the enrichment process was done over time  
134 at different generation batches (KMCG1, KMCG3, and KMCG6), showing a progressive  
135 decrease in consortia complexity (richness) over generation time (Fig. 2a). Ten, nine and five  
136 different classes were observed from KMCG1, KMCG3, and KMCG6, respectively. At the  
137 genus level, there were 44 and 31 genera classified from KMCG1 and KMCG3, and 14 from  
138 KMCG6. Only seven known genera (*Pseudochrobactrum*, *Chryseobacterium*, *Lysinibacillus*,

139 *Acinetobacter*, *Buttiauxella*, *Stenotrophomonas*, and *Comamonas*) and one unclassified were  
140 detected with a relative abundance > 0.1 % from KMCG6 (Fig. 2b). A similar trend was  
141 observed at the most sensitive OTU level, as the observed richness decreased from 162  
142 (KMCG1) to 85 (KMCG6), implicating that several OTUs were affiliated per genera. Seven  
143 OTUs were classified to *Pseudochrobactrum*, which was the most diverse genera, followed by  
144 *Chryseobacterium* and *Stenotrophomonas*, both containing four OTUs. Notably, 61.61% of the  
145 total sequences were clustered to OTU\_457, representing the *Chryseobacterium* sp. *KMC2*  
146 (*CKMC2*) in the KMCG6. *Pseudochrobactrum* sp. *KMC2* (*PKCM2*) and *Acinetobacter* sp.  
147 *KMC2* (*AKMC2*) accounted for 11.28 % and 5.04 %, respectively. These results show that  
148 selection reduced diversity and specific strains were enriched in the consortia.

149  
150 Note that it is preferable to obtain microbial consortia with desired functions prior to practical  
151 implementation, which can be obtained from naturally occurring microbial communities. But in  
152 most cases, this is still not sufficient to reach a desired effective consortium with a low diversity,  
153 which can be further used for downstream industrial applications (28, 29). For instance, more  
154 than 85 potential strains were detected from KMCG6, although the actual amount may be lower  
155 because multi-OTUs could originate from a same single strain due to intrinsic variability  
156 amongst multiple copies of 16S rRNA gene (30, 31). KMCG6 still had a high diversity with 14  
157 genera and more than 21 dominating OTUs (> 0.1 %) with distinct relative abundance, which  
158 likely corresponded to strains with different functionality towards keratin degradation. It  
159 indicates that the community diversity was still too high for understanding the underlying  
160 mechanisms. Therefore, simplification of this system is required to obtain more controllable  
161 consortia for downstream keratinous waste management, and with potentially enhanced activity.

162

163 **Optimal dilution for construction of a library of SMC.** The dilution-to-extinction strategy has  
164 already proven its efficiency for obtaining functional isolates and microbial consortia from  
165 various initial environmental inoculums such as seawater and rumen liquor (32-34), which was  
166 adapted here to our pre-enriched KMCG6. In order to determine the optimal dilution to KMCG6,  
167 we performed gradient dilutions with 24 replicates in keratin medium (KM). Cell density,  
168 protease, and keratinase activities measuring from individuals were used to evaluate the  
169 dissimilarity between distinct dilutions. Approximately 21 % (5) and 92 % (22) of the diluted  
170 replicates displayed no cell growth from dilution  $10^{-9}$  and  $10^{-10}$ , respectively. Dilution  $10^{-10}$  was  
171 excluded based on the observed low growth and lack of sufficient degradation efficiency.

172 Comparison of different dilutions was calculated according to their characteristics of degrading  
173 capacities (cell growth and enzyme activities) with Euclidean distance (Fig. 3a). It suggests that  
174 the profiles of dilution  $10^{-2}$  to  $10^{-8}$  had high similarity. Notably, dilution  $10^{-9}$  shows a clear and  
175 expected higher variability compared to lower dilutions (PERMANOVA, FDR < 0.1), such as  
176 e.g.  $10^{-8}$ , which has a good potential for assembling effective SMC.

177

178 Once an efficient pre-enriched consortium is secured, determining optimal dilution is as a  
179 critical step to obtain good heterogeneity in the subsequent SMC. Here, serial dilutions were  
180 carried out to simplify KMCG6. A comprehensive comparison was done for all dilutions,  
181 including 24 replicates per dilution. Concerning the number of replicates included, a sufficient  
182 quantity provides more reliable and statistically sound results. Previous studies showed that few  
183 replicates cultured from distinct dilutions resulted in a limited heterogeneity of functional  
184 microbial consortia (33, 35). The higher the better, as it will give greater chance to reproduce



185 and/or even improve the efficiency observed. However, a parsimonious approach would be to  
186 rely on an adjusted number of replicates, estimated based on prior evaluation of the taxonomic  
187 compositions and abundance of the constituting microbial members in the pre-enriched  
188 community.

189  
190 In addition, we performed CFU counting on LB agar to verify the number of viable cells  
191 between dilution  $10^{-8}$  (mean = 33 CFU) and dilution  $10^{-9}$  (mean = 3 CFU), showing an expected  
192 decrease of 10-fold (Fig. 3b). More importantly, they possessed various degradative capacities,  
193 including high performance in KM. Dilution  $10^{-9}$  hereby was selected as an optimal dilution to  
194 further construct a library of SMC consisting of 96 replicates (Fig. S1, for reviewers only).  
195 Additionally, 18 SMC were selected for further functional assessment with additional three  
196 SMC from dilution  $10^{-8}$ .

197  
198 **Diversity and structure of SMC during keratin degradation.** The taxonomic classification of  
199 these selected SMC was observed at OTU level using 16S rRNA gene amplicon sequencing (Fig.  
200 4a). In total, 15 OTUs were found in the SMC with a relative abundance above 0.1 %, including  
201 12 observed in KMCG6. Three new detected members were *Chryseobacterium sp. KMC5*,  
202 *Pseudomonas sp. KMC1* and *Stenotrophomonas sp. KMC4*. SMC were clustered into seven  
203 groups according to their taxonomic composition (weighted UniFrac). Three SMC from dilution  
204  $10^{-8}$ : SMC1, SMC2, and SMC3 were clustered as group 1 (Gr1), all featuring the dominant  
205 *CKMC2* (> 62.9%). The relative abundance of *Stenotrophomonas sp. KMC3* and *PKMC2* were  
206 more than 5 %. As expected, the composition of SMC in dilution  $10^{-9}$  was set apart from  $10^{-8}$ ,  
207 showing a substantial difference between these two dilutions. 18 SMC were divided into six

208 groups (Gr2 – Gr7), which had heterogeneous profiles in terms of OTU diversity (OUTs = 2-12).  
209 14 SMC (SMC4 – SMC17) from dilution  $10^{-9}$  still featured the dominant *CKMC2*, which  
210 initially constituted the majority of KMCG6. Four SMC (SMC18 – SMC21) contained little to  
211 none of *CKMC2* and they were classified into two different groups (Gr6 and Gr7).  
212 It is a remarkable fact that several phylogenetically-related strains from the same species co-  
213 exist in the KMCG6 (Fig. 2b), which is consistent with another similar enrichment study (28).  
214 The functions of individual strains are likely to be diverse within species and it is an unresolved  
215 challenge to identify the intraspecific variability (36). Here taxonomic classification of most  
216 individual SMC showed that only a few strains belonging to same species remained, which  
217 demonstrates that the method conveniently selected a simplified microbial consortium with  
218 specific functional strains, avoiding the ones with undesired traits. Besides, strains with low  
219 abundance emerged when compared to the initial microbial consortium (KMCG6), suggesting  
220 the approach is also efficient to acquire potentially crucial rare species into the SMC.

221  
222 **Comparative analysis of degradative capacities.** The initial microbial community is likely to  
223 be divided into different functional groups along with the gradual dilution process due to  
224 random reassembly of microbes caused by extinction and sampling effects (23). Cell density  
225 was measured at day three for all SMC along with protease and keratinase activities. This  
226 timeframe is optimized to achieve the highest cell densities and enzyme activities according to  
227 our previous work (11). The keratinolytic characteristics of SMC were measured individually,  
228 and displayed on the basis of the defined groups by consortia composition (Fig. 4b, 4c and 4d).  
229 Additionally, KMCG6 and the *CKMC2* isolate were compared to these groups. These results  
230 clearly show two distinct performance categories present amongst the groups in term of cell

231 density, enzyme activity, and residue ratio. The first category includes mostly groups from  
232 dilution  $10^{-9}$ : Gr2, Gr3, Gr4, and Gr5, together with Gr1 ( $10^{-8}$ ), all displaying good performance  
233 similar to KMCG6, while Gr6 and Gr7 have low performance with weak keratinolytic activity.  
234 SMC from  $10^{-8}$  (SMC1, SMC2, and SMC3) show good growth rates, with  $OD_{600nm}$  reaching up  
235 to (1.15 – 1.3). The  $OD_{600}$  of the 18 SMC from dilution  $10^{-9}$  ranges from 0.1 to 1.2. No visible  
236 difference in cell growth is observed between the good performers and KMCG6. It is worth  
237 noticing that the protease activity from Gr5 was significantly higher than *CKMC2*. On the other  
238 hand, the residue ratio of SMC from dilution  $10^{-9}$  was very divergent, indicating that the  
239 dilution-to-extinction cultures have succeeded in generating heterogeneous functional SMC.

240

241 **Potential biotic interactions.** To enhance the association between strains and degradative  
242 capacity, a Pearson's correlation based network was adopted (Fig. 5). As expected, the cell  
243 density and enzyme activities had a significant positive correlation with degradation efficiency.  
244 Seven strains (*CKMC2*, *PKMC2*, *Pseudochrobacterum sp. KMC5*, *Pseudochrobacterum sp. KMC6*,  
245 *Pseudochrobacterum sp. KMC7*, *Stenotrophomonas sp. KMC2 (SKMC2)* and *Stenotrophomonas*  
246 *sp. KMC4*) were connected with keratinolytic activity, which are likely to be the key players in  
247 the keratin degradation. Among them, *CKMC2* was the only strain that had positive correlations  
248 with all of the keratinolytic characteristics, suggesting that *CKMC2* is the keystone strain in the  
249 degradative process. Interestingly, all of the other strains in this correlated network have  
250 negative correlations with *CKMC2*. However, *PKMC2* has also a positive correlation with the  
251 degradation efficiency while having a negative one with *CKMC2*, indicating that these two  
252 strains likely undergo competitive exclusion, leading to the dominance of *CKMC2* (Fig. 4a).  
253 *PKMC2* also has numerous positive correlations with other strains such as *SKMC2* and

254 *Pseudochrobactrum sp. KMC7*, indicating that *PKMC2* may play a significant role to maintain  
255 the structure of the microbial consortia. However, *SKMC2* is associated to a decrease in  
256 degradation efficiency, indicating that it may be a cheater strategist benefiting from *PKMC2*.  
257 Additional four strains (*Acinetobacter sp. KMC1*, *AKMC2*, *Stenotrophomonas sp. KMC3*, and  
258 *Pseudomonas sp. KMC1*) only had satellite correlations, which probably have no effect on  
259 keratin degradation and could therefore be removed from the community. The network analysis  
260 based on the SMC library can be used to identify actual microbial interaction at the strain level,  
261 which may help to further optimize functional microbial consortia.

262  
263 The microbial diversity in the so-obtained SMC decreased remarkably while maintaining an  
264 equivalent keratinolytic capacity. It supports that dilution-to-extinction represents a simple and  
265 practical strategy, simplifying microbial consortia without losing efficiency. Currently,  
266 microbial consortia are not only applied on biodegradation. They have been applied extensively  
267 in other fields such as biomining, bioremediation, biofilm formation, or biosynthesis (37-39).  
268 We show that dilution-to-extinction culture is efficient to simplify microbial consortia, without  
269 impairing keratinolytic activity. Overall, a strategy combining enrichment and dilution-to-  
270 extinction cultures was applied successfully to assemble several SMC, which had heterogeneous  
271 capacities for keratinous waste management. Meanwhile, it provides a view of potential  
272 interactions among strains, which can be used for further designing and engineering of microbial  
273 consortia. This approach promotes the efficient selection of simplified functional consortia from  
274 high diversity environmental habitats and raises the possibility to obtain satisfactory microbial  
275 consortia for practical applications.

276

277 **Materials and Methods**

278

279 **Substrate and medium preparation.** Mixed  $\alpha$ -keratin materials (raw bristles and hooves) were  
280 collected from a Danish Crown slaughterhouse (Bragesvej, Denmark), washed with tap water  
281 thoroughly, and cut to about 2 mm in diameter mechanically by Daka Sarval (Løsning,  
282 Denmark). Keratin medium (KM) was prepared with 1 % keratinous materials with mineral salt  
283 medium (0.5 g/L of  $\text{NH}_4\text{Cl}$ , 0.5 g/L of  $\text{NaCl}$ , 0.3 g/L of  $\text{K}_2\text{HPO}_4$ , 0.4 g/L of  $\text{KH}_2\text{PO}_4$ , 0.1 g/L of  
284  $\text{MgCl}_2 \cdot 6\text{H}_2\text{O}$ ) (40), with keratins being the sole carbon source. KM was sterilized by  
285 autoclaving (21 min, 120 °C).

286

287 **Gradual dilutions of the microbial community.** Pre-enriched microbial consortium “KMCG6”  
288 from Kang et al. (11) was obtained after serial enrichments over time in successive generation  
289 batches, namely Keratin Microbial Consortia Generation batch number 6: “KMCG6”. KMCG6  
290 was inoculated into the LB liquid medium for overnight cultivation with shaking until the  
291 optical density ( $\text{OD}_{600}$ ) reached 0.7 - 0.8 (250 rpm, 24 °C). The cell suspension was gradually  
292 diluted in LB liquid medium with six dilutions ( $10^{-2}$ ,  $10^{-4}$ ,  $10^{-6}$ ,  $10^{-8}$ ,  $10^{-9}$  and  $10^{-10}$ ). For each  
293 dilution 24 replicates were prepared by transferring 200  $\mu\text{L}$  into individual wells of a 96-well  
294 plate. Plates were incubated overnight (250 rpm, 24 °C). Subsequently, all replicates from  
295 different dilutions were inoculated into 24-well plates with 1.5 mL KM at 1:100 ratio, and  
296 grown for three days (250 rpm, 24 °C) before functional assessment *via* cell density and  
297 protease activity assays.

298

299 **Cell density measurement and cell number count. (i) Cell density measurement.** Cultures

300 were left standing for 10 min. to precipitate large suspended keratin particles after cultivation.  
301 Thereafter, 200  $\mu$ L cell suspension from all dilutions were transferred to 96-well plates. Cell  
302 density was measured ( $OD_{600}$ ) using a microplate reader (Biotek, ELx808). **(ii) Cell number**  
303 **count.** 200  $\mu$ L cell suspension from 24 replicates of dilutions ( $10^{-8}$  and  $10^{-9}$ ) was plate spread on  
304 LB agar plates. Cell numbers were counted according to observable colony-forming units (CFU)  
305 on the plates after 48 h.

306  
307 **Construction of various microbial consortia library.** A total of 96 SMC were obtained based  
308 on optimal dilution condition ( $10^{-9}$ ) and 18 SMC were further selected from the library after the  
309 functional assessments. In addition, three SMC from dilution  $10^{-8}$  were as the control. In order to  
310 evaluate the degradation capacities accurately, the cultivation of 21 SMC was scaled up to 100  
311 mL KM by 1:100 ratio for 5 days (200 rpm, 24  $^{\circ}$ C).

312  
313 **Enzyme activity assays. (i) Protease activity assay.** Protease activity of microbial consortia  
314 was assessed with azocasein (Sigma-Aldrich, St. Louis, MO, USA) as described previously (11).  
315 100  $\mu$ L supernatant with 50  $\mu$ L 1% (w/v) azocasein were incubated at 30  $^{\circ}$ C for 30 min. with  
316 shaking at 200 rpm, then stopped by adding 150  $\mu$ L 10% (w/v) trichloroacetic acid and  
317 incubated at 4  $^{\circ}$ C for 15 min. 100  $\mu$ L mixture was mixed with 100  $\mu$ L of 0.5 M NaOH after  
318 centrifugation. Absorbance was recorded in 96-well plates at 415 nm and one unit (U) of  
319 protease activity was defined as 0.01 increase in absorbance. **(ii) Keratinolytic activity assay.**  
320 Preparation procedure for azokeratin and associated keratinolytic activity assay were described  
321 previously (11). The prepared keratin materials were coupled with a diazotized aryl amine to  
322 produce a chromophoric derivative, sulfanilic acid azokeratin. Keratinase activity of microbial

323 consortia was assayed using azokeratin as a substrate. The reaction mixture of supernatant and  
324 azokeratin were incubated for 1 h at 30 °C with shaking at 200 rpm, then cooled to room  
325 temperature for 5 min. 200 µL supernatant without azokeratin was transferred to 96-well plates  
326 and absorbance was measured as above. One unit (U) of keratinase activity was defined as the  
327 amount of enzyme required for 0.01 increasing in absorbance.

328

329 **Residual keratin substrate weight.** Keratin residue was collected from all of the microbial  
330 consortia after five days of cultivation in KM. The residual substrate was washed with deionized  
331 water using vacuum filtration until the flow-through was colourless to remove all of the  
332 microbial biomass and then dried at 50 °C for 48 h. The residual substrate was weighed and  
333 reported as the percentage (w/w %) of initial keratin substrate.

334

335 **Composition analysis of the microbial consortia.** A total of 5 mL cell suspension was  
336 collected from each microbial consortium after three days of cultivation. DNA extraction was  
337 done using the FAST Soil DNA Kit (MP Biomedicals, U.S.A), following the manufacturer's  
338 instructions. PCR amplification and sequencing preparation were performed as previously  
339 described (41), using the primers Uni341F (5'-CCTACGGGRBGCASCAG-3') and Uni806R  
340 (5'-GGACTACHVGGGTWTCTAAT-3') flanking the V3 and V4 regions of the 16S rRNA gene  
341 (42, 43). Purification of PCR products was done with Agencourt AMPure XP Beads (Beckman  
342 Coulter Genomics, MA, USA) according to the manufacturer's instructions. They were further  
343 quantified using Quant-iT™ High-Sensitivity DNA Assay Kit (Life Technologies) and pooled  
344 in equimolar concentrations using SequelPrep™ Normalization Plate (Thermo Fisher Scientific)  
345 before concentration using the DNA Clean and Concentrator™-5 kit (Zymo Research, Irvine,

346 CA, USA). Finally, a 20 pM pooled library was subjected to paired-end (2x250 bp) high-  
347 throughput sequencing on an Illumina MiSeq platform (Illumina, San Diego, CA, USA) using  
348 MiSeq reagent kit v2. Raw sequencing data were handled as previously described (44), which  
349 included quality control, trimming and clustering of sequences into OTU using a 97 % pairwise  
350 sequence similarity threshold. A representative sequence from each OTU cluster was given  
351 taxonomical annotation using RDP database (45). A read contingency table with OTU  
352 information including enrichment process was exported at the species level. The comparison of  
353 KCCG1, KMCG3, and KMCG6 was performed at class, genus and OTU levels. Phylogenetic  
354 tree of KMCG6 was constructed based on OTU sequences using MEGA7 (46) by maximum  
355 likelihood method. Only OTU with a relative abundance above 0.1 % were considered. The raw  
356 sequencing data is being prepared for deposition at the NIH short read archive.

357  
358 **Strain identification.** SMC from dilution  $10^{-9}$  with high keratinolytic activity were plated on LB  
359 plates and incubated at 24 °C for 48 h. In order to secure strain purity for accurate identification  
360 and isolation, single colony was picked and inoculated into LB liquid medium for overnight  
361 cultivation until  $OD_{600}$  reached 0.7 - 0.8 (250 rpm at 24 °C), then plated on new LB plates. This  
362 procedure was repeated three times until all colonies on the LB plates had the same  
363 morphological characteristics. Afterward, one single colony was picked, cultured in LB liquid  
364 medium overnight. DNA was extracted from 2 mL culture with FAST Soil DNA Kit (MP  
365 Biomedicals, U.S.A), following the manufacturer's instructions. The DNA was used as the  
366 template with primers 27F (5'-AGAGTTTGATCMTGGCTCAG-3') and 1492R (5'-  
367 TACGGYTACCTTGTTACGACTT-3') to amplify the full 16S rRNA gene, followed by  
368 BLAST identification with assembled OTUs.



369

370 **Statistical analysis.** Euclidean distance was calculated to determine the functional dissimilarity  
371 of SMC from different dilutions in terms of cell density, enzymes activity, and residual ratio.  
372 The multivariate homogeneity of group dispersion was analysed with “betadisper” (R-package  
373 “vegan”) and assessed using PERMANOVA. Benjamini–Hochberg correction was applied to  
374 control false discovery rate (FDR) for multiple testing (47). The significance level within  
375 dilutions was defined as the  $FDR < 0.1$ . For the selected 21 SMC, grouping was performed  
376 according to the compositional similarity using weighted UniFrac distance metric (48).  
377 Statistical differences of degrading capacities among SMC groups, KMCG6, and single strains  
378 were performed by one-way ANOVA using post-hoc Tukey’s HSD test ( $p < 0.05$ ).  
379 Relationships between microbes and degrading capacities were evaluated by using Pearson’s  
380 correlation, and visualized with Gephi (49). All of the statistical analysis in this study was  
381 caculated by using R (version 3.5.0).

382

### 383 **Acknowledgments**

384 This research was funded by the Danish Innovation Fund (grant number 1308-00015B,  
385 Keratin2Protein) and also under the support of the Chinese Scholarship Council  
386 (CSC) Scholarship Program.

387

388

389

390

391

## 392 References

- 393 1. Vert M, Doi Y, Hellwich K-H, Hess M, Hodge P, Kubisa P, Rinaudo M, Schué F. 2012.  
394 Terminology for biorelated polymers and applications (IUPAC Recommendations 2012). *Pure*  
395 *and Applied Chemistry* 84:377-410.
- 396 2. Chen M, Qin X, Zeng G. 2017. Biodegradation of carbon nanotubes, graphene, and their  
397 derivatives. *Trends in biotechnology* 35:836-846.
- 398 3. Huang J, Ling J, Kuang C, Chen J, Xu Y, Li Y. 2018. Microbial biodegradation of  
399 aniline at low concentrations by *Pigmentiphaga daeguensis* isolated from textile dyeing sludge.  
400 *International Biodeterioration & Biodegradation* 129:117-122.
- 401 4. Ghosal D, Ghosh S, Dutta TK, Ahn Y. 2016. Current state of knowledge in microbial  
402 degradation of polycyclic aromatic hydrocarbons (PAHs): a review. *Frontiers in microbiology*  
403 7:1369.
- 404 5. Kumar S, Kaushik G, Dar MA, Nimesh S, Lopez-Chuken UJ, Villarreal-Chiu JF. 2018.  
405 Microbial Degradation of Organophosphate Pesticides: A Review. *Pedosphere* 28:190-208.
- 406 6. Brown ME, Chang MC. 2014. Exploring bacterial lignin degradation. *Current opinion in*  
407 *chemical biology* 19:1-7.
- 408 7. Shong J, Diaz MRJ, Collins CH. 2012. Towards synthetic microbial consortia for  
409 bioprocessing. *Current Opinion in Biotechnology* 23:798-802.
- 410 8. Subashchandrabose SR, Ramakrishnan B, Megharaj M, Venkateswarlu K, Naidu R.  
411 2011. Consortia of cyanobacteria/microalgae and bacteria: biotechnological potential.  
412 *Biotechnology advances* 29:896-907.
- 413 9. Hays SG, Patrick WG, Ziesack M, Oxman N, Silver PA. 2015. Better together:  
414 engineering and application of microbial symbioses. *Current opinion in biotechnology* 36:40-49.
- 415 10. Puentes-Téllez PE, Salles JF. 2018. Construction of effective minimal active microbial  
416 consortia for lignocellulose degradation. *Microbial ecology*:1-11.
- 417 11. Kang D, Herschend J, Al-Soud WA, Mortensen MS, Gonzalo M, Jacquioud S, Sørensen  
418 SJ. 2018. Enrichment and characterization of an environmental microbial consortium displaying  
419 efficient keratinolytic activity. *Bioresource technology* 270:303-310.
- 420 12. Brenner K, You L, Arnold FH. 2008. Engineering microbial consortia: a new frontier in  
421 synthetic biology. *Trends in biotechnology* 26:483-489.
- 422 13. Mikesková H, Novotný Č, Svobodová K. 2012. Interspecific interactions in mixed  
423 microbial cultures in a biodegradation perspective. *Applied microbiology and biotechnology*  
424 95:861-870.
- 425 14. Luo F, Devine CE, Edwards EA. 2016. Cultivating microbial dark matter in benzene-  
426 degrading methanogenic consortia. *Environmental microbiology* 18:2923-2936.
- 427 15. Burniol-Figols A, Varrone C, Le SB, Daugaard AE, Skiadas IV, Gavala HN. 2018.  
428 Combined polyhydroxyalkanoates (PHA) and 1, 3-propanediol production from crude glycerol:  
429 Selective conversion of volatile fatty acids into PHA by mixed microbial consortia. *Water*  
430 *research* 136:180-191.
- 431 16. Jiménez DJ, Dini-Andreote F, DeAngelis KM, Singer SW, Salles JF, van Elsas JD. 2017.  
432 Ecological insights into the dynamics of plant biomass-degrading microbial consortia. *Trends in*  
433 *microbiology* 25:788-796.
- 434 17. Shade A, Peter H, Allison SD, Baho D, Berga M, Bürgmann H, Huber DH, Langenheder  
435 S, Lennon JT, Martiny JB. 2012. Fundamentals of microbial community resistance and  
436 resilience. *Frontiers in microbiology* 3:417.

- 437 18. Awasthi A, Singh M, Soni SK, Singh R, Kalra A. 2014. Biodiversity acts as insurance of  
438 productivity of bacterial communities under abiotic perturbations. *The ISME journal* 8:2445.
- 439 19. Wu Y-R, He J. 2013. Characterization of anaerobic consortia coupled lignin  
440 depolymerization with biomethane generation. *Bioresource technology* 139:5-12.
- 441 20. Banerjee S, Kirkby CA, Schmutter D, Bissett A, Kirkegaard JA, Richardson AE. 2016.  
442 Network analysis reveals functional redundancy and keystone taxa amongst bacterial and fungal  
443 communities during organic matter decomposition in an arable soil. *Soil Biology and*  
444 *Biochemistry* 97:188-198.
- 445 21. Lee D-J, Show K-Y, Wang A. 2013. Unconventional approaches to isolation and  
446 enrichment of functional microbial consortium—a review. *Bioresource technology* 136:697-706.
- 447 22. Wang A, Gao L, Ren N, Xu J, Liu C, Lee D-J. 2010. Enrichment strategy to select  
448 functional consortium from mixed cultures: consortium from rumen liquor for simultaneous  
449 cellulose degradation and hydrogen production. *International Journal of Hydrogen Energy*  
450 35:13413-13418.
- 451 23. Roger F, Bertilsson S, Langenheder S, Osman OA, Gamfeldt L. 2016. Effects of  
452 multiple dimensions of bacterial diversity on functioning, stability and multifunctionality.  
453 *Ecology* 97:2716-2728.
- 454 24. Coulombe PA, Omary MB. 2002. ‘Hard’and ‘soft’principles defining the structure,  
455 function and regulation of keratin intermediate filaments. *Current opinion in cell biology*  
456 14:110-122.
- 457 25. Kornilłowicz-Kowalska T, Bohacz J. 2011. Biodegradation of keratin waste: theory and  
458 practical aspects. *Waste management* 31:1689-1701.
- 459 26. Verma A, Singh H, Anwar S, Chattopadhyay A, Tiwari KK, Kaur S, Dhillon GS. 2017.  
460 Microbial keratinases: industrial enzymes with waste management potential. *Critical reviews in*  
461 *biotechnology* 37:476-491.
- 462 27. Mothé MG, Viana LM, Mothé CG. 2018. Thermal property study of keratin from  
463 industrial residue by extraction, processing and application. *Journal of Thermal Analysis and*  
464 *Calorimetry* 131:417-426.
- 465 28. Himmelberg AM, Bröls T, Farmani Z, Weyrauch P, Barthel G, Schrader W,  
466 Meckenstock RU. 2018. Anaerobic degradation of phenanthrene by a sulfate-reducing  
467 enrichment culture. *Environmental microbiology* 20:3589-3600.
- 468 29. Guerra AB, Oliveira JS, Silva-Portela RC, Araujo W, Carlos AC, Vasconcelos ATR,  
469 Freitas AT, Domingos YS, de Farias MF, Fernandes GJT. 2018. Metagenome enrichment  
470 approach used for selection of oil-degrading bacteria consortia for drill cutting residue  
471 bioremediation. *Environmental Pollution* 235:869-880.
- 472 30. Hakovirta JR, Prezioso S, Hodge D, Pillai SP, Weigel LM. 2016. Identification and  
473 analysis of informative single nucleotide polymorphisms in 16S rRNA gene sequences of the  
474 *Bacillus cereus* group. *Journal of clinical microbiology:JCM*. 01267-16.
- 475 31. Ninet B, Monod M, Emler S, Pawlowski J, Metral C, Rohner P, Auckenthaler R,  
476 Hirschel B. 1996. Two different 16S rRNA genes in a mycobacterial strain. *Journal of Clinical*  
477 *Microbiology* 34:2531-2536.
- 478 32. Hoefman S, van der Ha D, De Vos P, Boon N, Heylen K. 2012. Miniaturized extinction  
479 culturing is the preferred strategy for rapid isolation of fast-growing methane-oxidizing  
480 bacteria. *Microbial biotechnology* 5:368-378.
- 481 33. Ho K-L, Lee D-J, Su A, Chang J-S. 2012. Biohydrogen from lignocellulosic feedstock  
482 via one-step process. *International Journal of Hydrogen Energy* 37:15569-15574.

- 483 34. Sosa OA, Gifford SM, Repeta DJ, DeLong EF. 2015. High molecular weight dissolved  
484 organic matter enrichment selects for methylotrophs in dilution to extinction cultures. *The ISME*  
485 *journal* 9:2725.
- 486 35. Ho K-L, Lee D-J, Su A, Chang J-S. 2012. Biohydrogen from cellulosic feedstock:  
487 dilution-to-stimulation approach. *International Journal of Hydrogen Energy* 37:15582-15587.
- 488 36. Cianciaruso MV, Batalha MA, Gaston KJ, Petchey OL. 2009. Including intraspecific  
489 variability in functional diversity. *Ecology* 90:81-89.
- 490 37. Brune KD, Bayer T. 2012. Engineering microbial consortia to enhance biomining and  
491 bioremediation. *Frontiers in microbiology* 3:203.
- 492 38. Ren D, Madsen JS, Sørensen SJ, Burmølle M. 2015. High prevalence of biofilm synergy  
493 among bacterial soil isolates in cocultures indicates bacterial interspecific cooperation. *The*  
494 *ISME journal* 9:81.
- 495 39. Zhou K, Qiao K, Edgar S, Stephanopoulos G. 2015. Distributing a metabolic pathway  
496 among a microbial consortium enhances production of natural products. *Nature biotechnology*  
497 33:377.
- 498 40. Bertsch A, Coello N. 2005. A biotechnological process for treatment and recycling  
499 poultry feathers as a feed ingredient. *Bioresource technology* 96:1703-1708.
- 500 41. Nunes I, Jacquiod S, Brejnrod A, Holm PE, Johansen A, Brandt KK, Priemé A, Sørensen  
501 SJ. 2016. Coping with copper: legacy effect of copper on potential activity of soil bacteria  
502 following a century of exposure. *FEMS microbiology ecology* 92:fiw175.
- 503 42. Takai K, Horikoshi K. 2000. Rapid detection and quantification of members of the  
504 archaeal community by quantitative PCR using fluorogenic probes. *Applied and Environmental*  
505 *Microbiology* 66:5066-5072.
- 506 43. Klindworth A, Pruesse E, Schweer T, Peplies J, Quast C, Horn M, Glöckner FO. 2013.  
507 Evaluation of general 16S ribosomal RNA gene PCR primers for classical and next-generation  
508 sequencing-based diversity studies. *Nucleic acids research* 41:e1-e1.
- 509 44. Jacquiod S, Cyriaque V, Riber L, Al-Soud WA, Gillan DC, Wattiez R, Sørensen SJ.  
510 2018. Long-term industrial metal contamination unexpectedly shaped diversity and activity  
511 response of sediment microbiome. *Journal of hazardous materials* 344:299-307.
- 512 45. Cole JR, Wang Q, Fish JA, Chai B, McGarrell DM, Sun Y, Brown CT, Porras-Alfaro A,  
513 Kuske CR, Tiedje JM. 2013. Ribosomal Database Project: data and tools for high throughput  
514 rRNA analysis. *Nucleic acids research* 42:D633-D642.
- 515 46. Kumar S, Stecher G, Tamura K. 2016. MEGA7: molecular evolutionary genetics  
516 analysis version 7.0 for bigger datasets. *Molecular biology and evolution* 33:1870-1874.
- 517 47. Benjamini Y, Hochberg Y. 1995. Controlling the false discovery rate: a practical and  
518 powerful approach to multiple testing. *Journal of the royal statistical society Series B*  
519 *(Methodological)*:289-300.
- 520 48. Lozupone C, Lladser ME, Knights D, Stombaugh J, Knight R. 2011. UniFrac: an  
521 effective distance metric for microbial community comparison. *The ISME journal* 5:169.
- 522 49. Bastian M, Heymann S, Jacomy M. Gephi: an open source software for exploring and  
523 manipulating networks, Third international AAAI conference on weblogs and social media.  
524 2009.
- 525
- 526

527 **Figures 1-5**

528

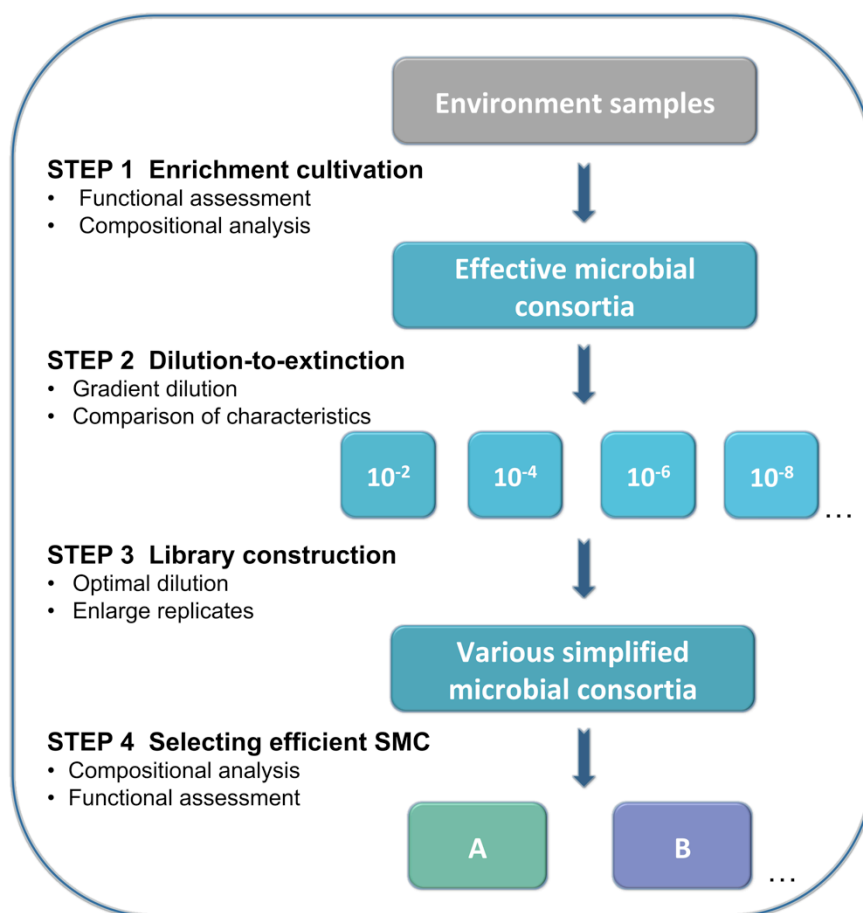

529

530

531 **Fig. 1. Workflow of enrichment and dilution-to-extinction cultures to select simplified**

532 **microbial consortia (SMC) for keratin degradation.** This workflow includes four steps: 1)

533 Enrichment for the desired traits e.g. keratinolytic activity by selection in keratin medium,

534 where keratin is the sole carbon source. Several serial transfers were performed to obtain

535 effective microbial consortia. This process was evaluated by functional assessment (cell density,

536 enzymes activity, and ratio of the residual substrate) and compositional analysis. 2) Gradient

537 dilution was conducted to the enriched effective microbial consortia. Six gradual dilutions were

538 prepared, from dilution  $10^{-2}$  to  $10^{-10}$  with 24 replicates. The dissimilarity between dilutions was

539 evaluated by Euclidean distance calculation based on functional assessment criteria. 3) Library  
540 construction was done from the dilution offering the optimal dissimilarity among replicates.  
541 Dilution  $10^{-9}$  was selected to construct the SMC library in this case. 4) Selection of the most  
542 promising SMC is based on functional and compositional characterization.  
543  
544

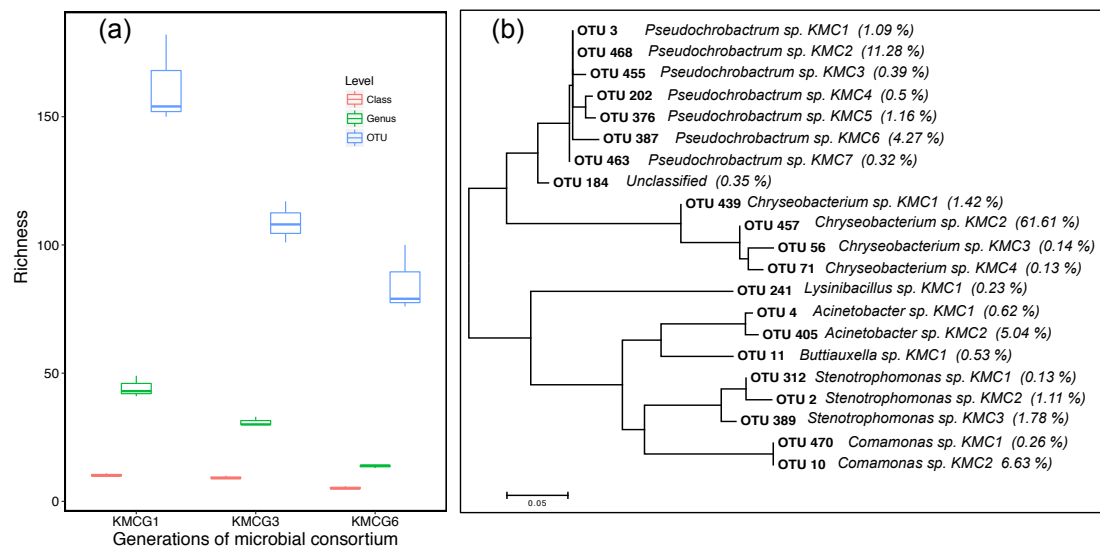

545

546

547 **Fig. 2. Microbial diversity from the enrichment process.** (a). The observed values of class,  
548 genus, and OTU from different generations in the enrichment process (KMCG1, KMCG3, and  
549 KMCG6). (b). Phylogenetic tree of dominant OTUs from KMCG6 (relative abundance > 0.1 %).

550

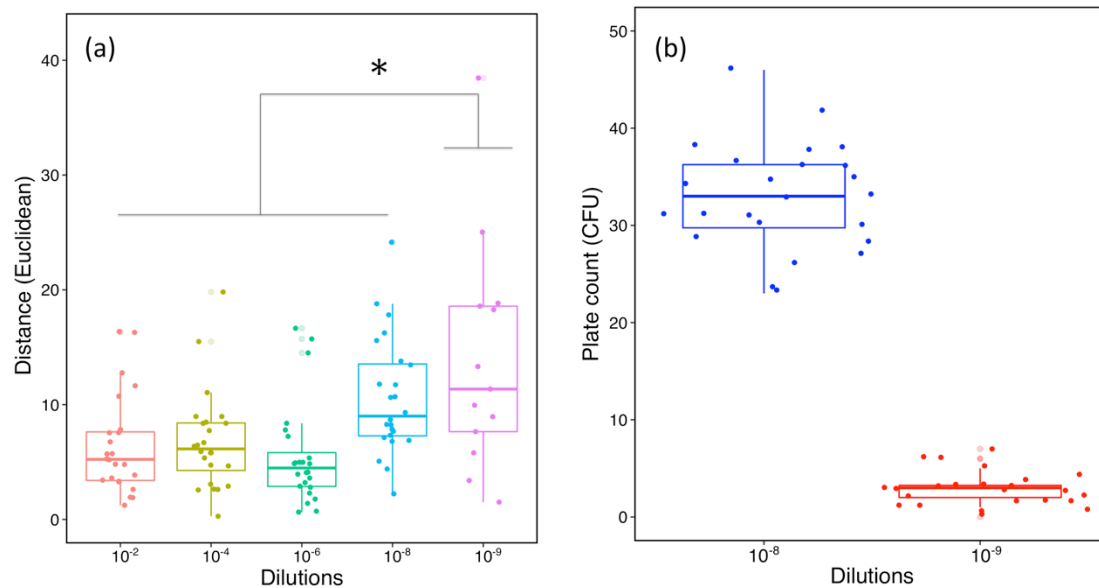

551

552

553 **Fig. 3. Characteristic comparison of SMC from the dilution-to-extinction culture. (a).**

554 Distance comparison based on the characteristics of OD and protease and keratinase activity,

555 with Euclidean dissimilarity index (n=24). Star indicates significant statistical difference

556 (PERMANOVA, FDR < 0.1). (b). Numbers of CFU from dilution 10<sup>-8</sup> and 10<sup>-9</sup> by plate

557 counting (n=24).

558



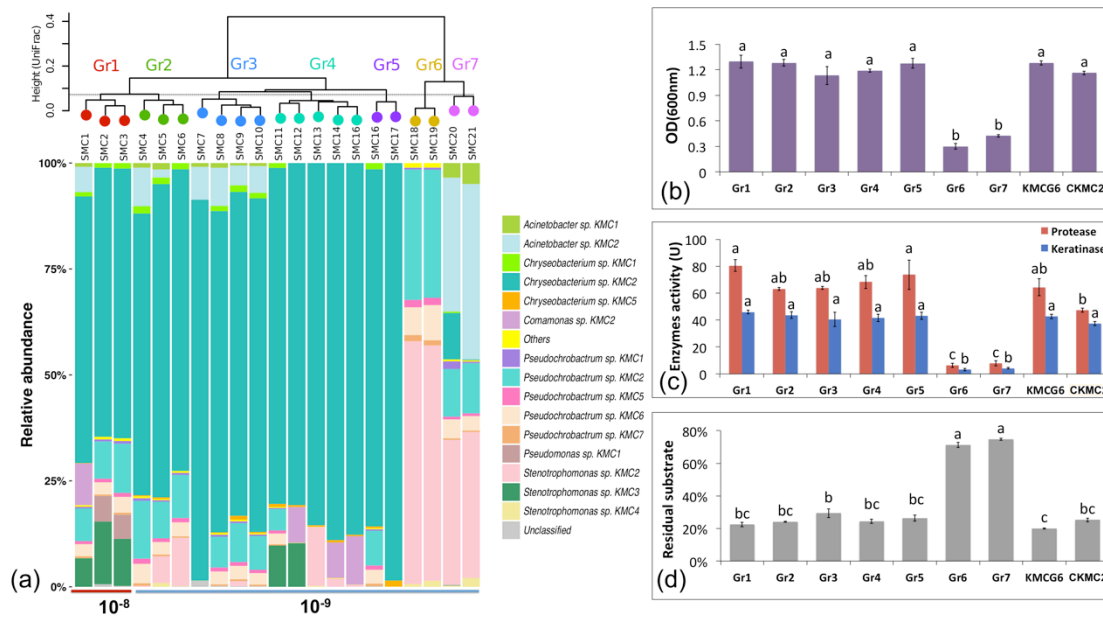

559

560

561 **Fig. 4. Integrated comparison of selected simplified microbial consortia. (a). 21 SMC**

562 divided into seven groups based on their community similarities from 16s rRNA gene analysis

563 (weighted UniFrac distance). Group 1 (Gr1) includes SMC1, SMC2, and SMC3 from dilution

564  $10^{-8}$ . 18 selected SMC (SMC4 – SMC21) were clustered as six groups (Gr2 – Gr7) from dilution

565  $10^{-9}$ . (b). Cell density (OD<sub>600nm</sub>) comparison of group 1-7, KMC6 and the single strain

566 *Chryseobacterium sp. KMC2* (CKMC2). (c) Comparison of enzymes (protease and keratinase)

567 activity. (d) Comparison of the residual substrate ratio. Lowercase letters (e.g. a, b and c) in 4b,

568 4c and 4d refer to significant differences between groups with one-way ANOVA using post-hoc

569 Tukey's HSD test ( $p < 0.05$ ).

570

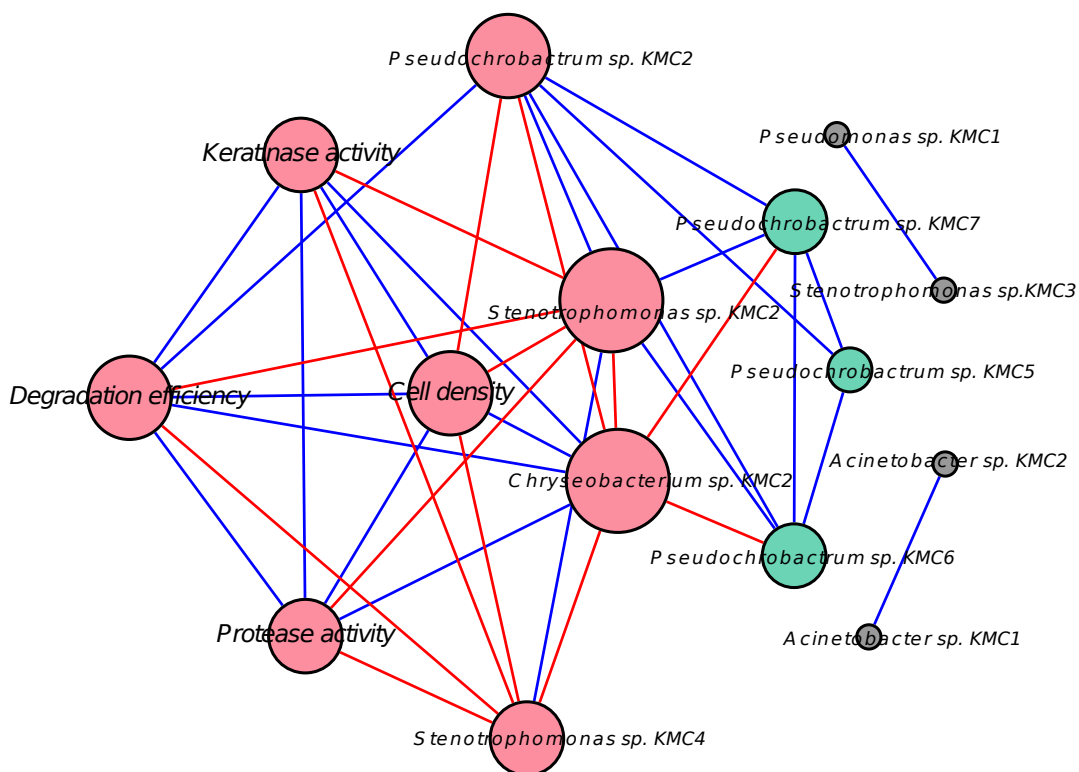

571

572

573 **Fig. 5. Network showing relationships between strains and degradative capacity using**

574 **Pearson's correlation.** The nodes represent either OTUs or characteristics of keratin

575 degradation, e.g. degradation efficiency and keratinase activity. Red nodes indicate the direct

576 correlation with degradation efficiency (DE). Green nodes had an indirect correlation with DE

577 through other strains. Grey nodes had no significant correlation with DE. Size of the nodes

578 reflects the number of connections (degree); larger nodes have more significant connections.

579 Blue lines represent positive correlations and red lines represent negative correlation.
